# Supplementary material for: Unexpected cleavage of tetrahydrofuran by catalytic reductive lithiation
Source: Royal Society of Chemistry journal article supplement (doi:10.1039/b312972a), 2004-01-01
Supplement: b312972a.doc [file b312972a.doc]

**Experimental Section**

**General Experimental Methods:** Reactions were carried out under an argon atmosphere using flame-dried glassware with magnetic stirring and degassed solvents. Et2O and THF were distilled from Na/benzophenone. The solution was sonicated in a bath sonicator (Sonorex RK 100H from Bandelin Electronic). For column chromatography, silica gel (40-60 µm) was used. Infrared are reported in reciprocal centimetres (cm-1) along with relative intensity (w = weak, m = medium, s = strong absorption).

**Kinetic of THF cleavage.**

Three kinetic experiments were performed simultaneously. Di-*ter*-butylbiphenylide (DBB) (266 mg, 1 mmol) was added into a two neck round-bottom flask of 50 mL under an argon atmosphere. Lithium ribbon was prepared by scrapping the dark oxide coating off the surface while it was immersed in mineral oil. The metal was dipped in hexane, in order to remove the oil, and then weighed (175 mg, 25 mmol) in a tarred beaker containing mineral oil. The metal was cut into small very shiny pieces while immersed in mineral oil. The small lithium pieces were dipped again in hexane and quickly added while the flask was rapidly being purged with argon. Then, 10 mL of THF was added and the solution was sonicated for 2h at 25°C. Aliquots (100 μL) were syringed out as the reaction progressed and quenched with 900 μL of moist THF. The aliquots were analysed by GC. The concentrations of butanol were calculated from the areas under the peak and were averages from three experiments.

**(3,7-Dimethyl-octa-2,6-dienyl)-trimethyl-silane (2) (preparation corresponding to entry 1 of Table 1).**

To a two neck round-bottom flask equipped with an argon inlet, were added THF (1.4 ml) and di-*ter*-butylbiphenylide (DBB) (21 mg, 0.08 mmol). Small lithium pieces (278 mg, 40 mmol) were prepared as previously and quickly added to the solution of DBB while the flask was rapidly being purged with argon. The mixture was sonicated for 5 min, then cooled to -78°C. A solution of allylthioether **1** (200 mg, 0.81 mmol) in THF (1 mL) was added to a preformed solution of LiDBB under argon and the mixture was stirred until the originally dark-green colour reappeared, then TMSCl ( 176 mg, 1.64 mmol) was added. The reaction was maintained at -78°C for further 5 min and the resulting solution was filtered to remove the lithium excess. The mixture was extracted three times with Et2O. The combined organic layer was washed with water, brine, dried over MgSO4 and concentrated to dryness. Purification of the resulting yellow oily residue by chromatography (hexane), yielded 121 mg (71%) of **2** as a colourless oil: R*f* = 0.76 (hexane). RMN 1H (300 MHz, CDCl3): -0.01 (s, 9H), 1.38 (d, J= 8.6 Hz, 2H), 1.54 (s, 3H), 1.60 (s, 3H), 1.67 (s, 3H), 1.99-2.08 (m, 4H), 5.07-5.20 (m, 2H). RMN 13C (75 MHz, CDCl3): -1.79, 15.68, 17.65, 18.55, 25.71, 26.81, 39.95, 120.27, 124.56, 131.05, 132.19. IR (KBr):2956 (s), 2919 (s), 1445 (m), 1412 (w), 1377 (m), 1247 (s), 1153 (m), 1107 (w), 1073 (w), 985 (w), 856 (s), 754 (m), 694 (m) cm-1. SM (IE, 70 eV): 210 (M+, 13), 195 (3), 153 (7), 141 (28), 73.4 (100), 69 (8). Anal. Calcd forC15H21NS : C, 74.20; H, 12.45. Found: C, 74.26; H, 12.37.

**E,E-(3,7-Dimethyl-1-phenylsulfanyl-octa-2,6dienyl)-trimethyl-silane (3) (preparation corresponding to entry 3 of Table 1).**

To a two neck round-bottom flask equipped with an argon inlet, were added THF (1.4 ml) and di-*ter*-butylbiphenylide (DBB) (21 mg, 0.08 mmol). Small lithium pieces (278 mg, 40 mmol) were prepared as previously and quickly added to the solution of DBB while the flask was rapidly being purged with argon. The mixture was sonicated for 1h, then cooled to -78°C. A solution of allylthioether **1** (200 mg, 0.81 mmol) in THF (1 mL) was added to a preformed solution of LiDBB under argon and the mixture was stirred until the originally dark-green colour reappeared, then TMSCl ( 176 mg, 1.64 mmol) was added. The reaction was maintained at -78°C for further 5 min and the resulting solution was filtered to remove the lithium excess. The mixture was extracted three times with Et2O. The combined organic layer was washed with water, brine, dried over MgSO4 and concentrated to dryness. Purification of the resulting yellow oily residue by chromatography (hexane), yielded 178 mg (69%) of **3** as a colourless oil: *Rf* = 0.34 (hexane). RMN 1H (300 MHz, CDCl3): 0.14 (s, 9H), 1.51 (s, 3H), 1.57 (s, 3H), 1.63 (s, 3H), 1.95-2.02 (m, 4H), 3.43-3.46 (d, J= 11.2 Hz), 5.09 (d, J= 11.2 Hz, 1H), 4.97-5.02 (m, 1H), 7.11-7.28 (m, 5H). RMN 13C (75 MHz, CDCl3): -2.8, 16.2, 17.7, 25.6, 26.6, 34.4, 39.7, 124.2, 124.7, 125.5, 128.4, 129.3, 131.3, 134.6, 132.2. IR (KBr):3077 (s), 3059 (s), 3006 (m), 2979 (m), 2917 (m), 2854 (w), 1945 (w), 1851 (w), 1636 (m), 1583 (s), 1480 (s), 1438 (s), 1425 (m), 1404 (m), 1301 (w), 1268 (w), 1229 (m), 1184 (w), 1156 (w), 1089 (m), 1069 (m), 1025 (m), 987 (m), 919 (m), 866 (w) 737 (s), 690 (s) cm-1. SM (IE, 70 eV): 318 (M+, 7), 249 (32), 167 (6), 151 (4), 136 (28), 121 (8), 99 (11), 93 (14), 80 (7), 73 (100), 69 (43), 59 (9). Anal. Calcd forC19H30SSi : C, 71.63; H, 9.49. Found: C, 71.52; H, 9.55.

**E,E-3,7-Dimethyl-1,1-bis-trimethylsilanyl-octa-2,6-diene (4)**

To a two neck round-bottom flask equipped with an argon inlet, were added THF (1.4 ml) and di-*ter*-butylbiphenylide (21 mg, 0.08 mmol). Small lithium pieces (278 mg, 40 mmol) were prepared as previously and quickly added to the solution of DBB while the flask was rapidly being purged with argon. The mixture was sonicated for1 h, then cooled to -78°C. A solution of allylthioether **1** (200 mg, 0.81 mmol) in THF (1 mL) was added to a preformed solution of LiDBB under argon and the mixture was stirred until the originally dark-green colour reappeared. Then, TMSCl (89 mg, 0.82 mmol) was added. The reaction was stirred at -78°C until the originally dark-green colour reappeared again, then TMSCl (178 mg, 0.64 mmol) was added. The reaction was maintained at -78°C for further 30 min and the resulting solution was filtered to remove the lithium excess. The mixture was extracted three times with Et2O. The combined organic layer was washed with water, brine, dried over MgSO4 and concentrated to dryness. Purification of the resulting yellow oily residue by chromatography (hexane), yielded 156 mg (68%) of **4** as a colourless oil: *Rf* = 0.39 (hexane). RMN 1H (300 MHz, CDCl3): 0.00 (s, 18H), 1.11 (d, J= 12.6 Hz, 1H) 1.49 (s, 3H), 1.60 (s, 3H), 1.66 (s, 3H), 1.92-2.02 (m, 4H), 5.02-5.14 (m, 2H). RMN 13C (75 MHz, CDCl3): -0.4, 15.7, 17.7, 20.4, 25.7, 26.9, 40.2, 122.0, 124.6, 131.1, 135.1. IR (KBr):2940 (s), 2959 (m), 1401 (m), 1457 (w), 1402 (w), 1327 (m), 1289 (s), 1134 (m), 1178 (w), 1002 (w), 967 (w), 836 (s), 694 (m) cm-1. SM (IE, 70 eV): 282 (M+, 7), 213 (41), 207 (22), 193 (4), 179 (6), 125 (100), 109 (4), 97 (3), 73 (100), 69 (9), 59 (11). Anal. Calcd forC16H34Si2 : C, 68.00; H, 12.13. Found: C, 68.08; H, 12.16.

**1,3-Bis-(*tert*-butyl-dimethyl-silanyl)-propene (6):**

To a two neck round-bottom flask equipped with an argon inlet, were added THF (5 ml) and di-*ter*-butylbiphenylide (88 mg, 0.33 mmol). Small lithium pieces (1.155 g, 166.5 mmol) were prepared as previously and quickly added to the solution of DBB while the flask was rapidly being purged with argon. The mixture was sonicated for 1 h, then cooled to -78°C. A solution of allylthioether **6** (500 mg, 3.33 mmol) in THF (5 mL) was added to a solution of LiDBB under argon and the mixture was stirred until the originally dark-green colour reappeared, then TBDMSCl (1.81 g, 16.7 mmol, 5 eq.) was added. The reaction was maintained at -78°C for further 2 h and the resulting solution was filtered to remove the lithium excess. The mixture was extracted three times with Et2O. The combined organic layer was washed with water, brine, dried over MgSO4 and concentrated to dryness. Purification of the resulting yellow oily residue by chromatography (hexane), yielded 616 mg (69%) of **6** as a colourless oil: R*f* = 0.43 (hexane). RMN 1H (300 MHz, CDCl3): 0.07 (s, 6H), 0.19 (s, 6H), 0.85 (s, 9H), 0.88 (s, 9H), 1.65 (d, J= 7.8 Hz), 5.39 (d, J= 18.4 Hz), 5.01 (td, J= 18.4 Hz, 7.8 Hz). RMN 13C (75 MHz, CDCl3): 16.57, 16.77, 26.45, 26.53, 24.64, 125.00, 145.40, 131.06, 135.09. SM (IE, 70 eV): 270 (M+, 9), 263 (11), 249 (13), 221 (4), 213 (51), 207 (9), 147 (12), 141 (4), 135 (11), 125 (14), 113 (19), 99 (12), 83 (4), 59 (10). Anal. Calcd forC15H34Si2: C, 66.58; H, 12.66. Found: C, 66.71; H, 12.61.
